# Supplementary material
Source: PubMed Central journal article supplement (PMC5757841)
Supplement: NIHMS830354-supplement-1.pdf [file NIHMS830354-supplement-1.pdf]

**A**

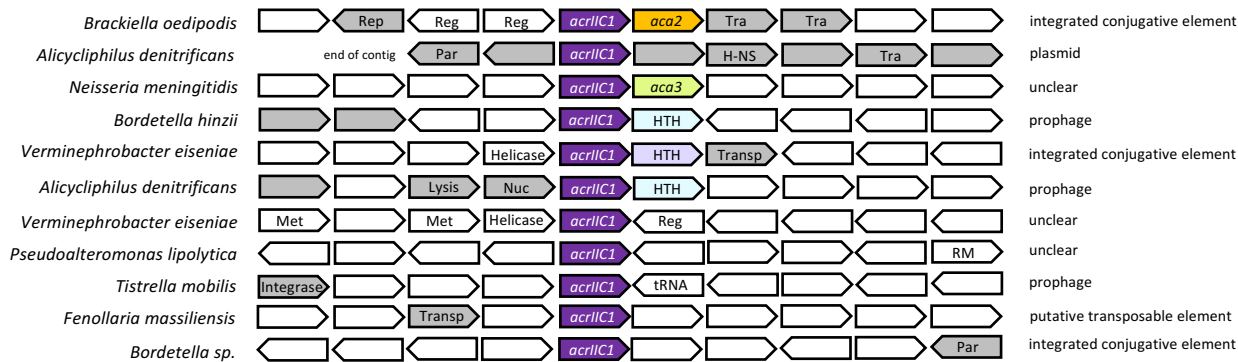

**B**

*Brackiella oedipodis*/1-91  
*Alicyclophilus denitrificans*/1-92  
*Neisseria meningitidis*/1-85  
*Bordetella hinzii*/1-87  
*Verminephrobacter eiseniae*/1-103  
*Alicyclophilus denitrificans*\_2/1-133  
*Verminephrobacter eiseniae*\_2/1-147  
*Pseudoalteromonas lipolytica*/1-117  
*Tistrella mobilis*/1-85  
*Fenollaria massiliensis*/1-149  
*Bordetella sp.*/1-95

```

1 -----MKEVFKIKFLV-----T-KCGW19
1 -----MNVPYDFAG-----N-Y-CVG18
1 -----MNKTYIKGN--A-----G-YDCGL18
1 -----MNVEPIPDLAEE-----A-YHGAGW19
1 -----MTLTDWI VDRVRHNTMN-VFKVPSLAD-----K-YHAGY34
1 NTDSQGREALSVIHINVPRAMKARWYKASQSR-----QKLTDWIIEKLESRTMN-VYDPIELAA-----K-YHAGH67
1 MIERSAKRARPIRRI--PRQGRRLHPACARCAOIMVGARWPPQGVTLTDWI VDRVRHNTMN-VFKVPSLAD-----K-YHAGY78
1 -----MNFVLCVFKLGN--YFKLONPLAA-----EYRCCGK30
1 -----MN-VYVPDALQH-----H-YKRRG119
1 -----MLYSEKVM-DHMPRNVEEMENPSSEVEVGNAKCDIMRMYLKIDENDIITDVKFK--YCCG162
1 -----MASVTFPLDNLAR-----E-RLECGW22
20 ALACTK-DGEIIDLTYVR-----DGLIEYDENFDGLEPE-IIYYDVVASQAQKEVAYRVE-MGEFTFGL-----CSCWEF-----NVM--91
19 ALAAIA-GGQVLSLKYIAEHVDEKTDQL--AEG-GAPARNAA--FKWIGSQSAGVVRELEA--LGRVCAQM-----CSCWEF-----VEL--92
19 CLAAIS-ENEAIKVKYR-----DLCDDDG-----DDKAEDWRWGTDSRWKAAALEEQ-FAVYSVGM-----ASCWEF-----VEL--85
20 ALGAVL-GGQLVALRYVA-----DLGVSMEP-GAAEVOAV-----RAWIESPGAAPVRELEA--LGRVTIGM-----CSCWAF-----VEU--87
35 ALAAIV-AGQLVDIVVYLA-----DMLPDFGGQDQPTRADA-----QTAI DESPLVAPVRLHQA--LGSVHMGM-----LSCWAF-----VEL--103
68 ALAAVT-GGQIVDLYVYIE-----DALLDYDA-DAPGALAA-----AIDQRLAPTVRRLEA--LQVSGM-----CGAWEF-----VEL--133
79 ALAAIV-AGQLVDIVVYLA-----DMLPDFGGQDQPTRADA-----QTAI DESPLVAPVRLHQA--LGSVHMGM-----LSCWAF-----VEL--147
31 AWIAIA-NQIQAIKYMD-----DAWDPLEAQREQEG-----VYRQKQDILSSKRIEKG-----CSCWFTTNAYYCEAESLLAAIESEREYMLNT
20 ALGAR-NGELVALVYVR-----DLIPDE----ADTVEAA-----PSIGDNARVAQVARALEKDFGVVRVGI-----VSSWEF-----VEL--85
63 AIASISMATELIKGKSIINDAI-----LSNKEVAENLDGLPPI--KMHC SVLAEAEIKAAALYDYKESGKHKVKGLENYEPKDDLHDHEH-----VELD--149
23 ALAAIS-GNRTAAVREIR-----RSPQVAQLPIEAQAAEVI RRWLD TLPASVVDELEQ-LGRITVGM-----CHEGCF-----ELC--95
  
```
