# Supplementary material
Source: PubMed Central journal article supplement (PMC5757841)
Supplement: NIHMS830354-supplement-3.pdf [file NIHMS830354-supplement-3.pdf]

**A**

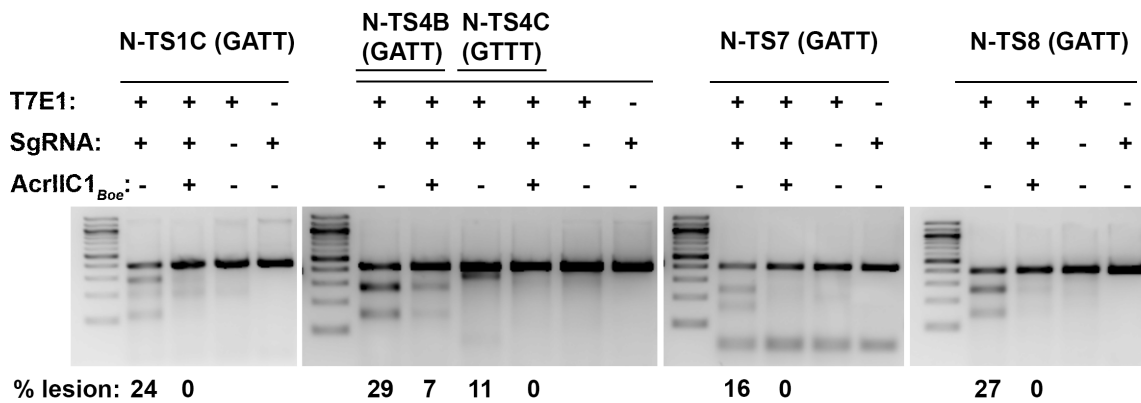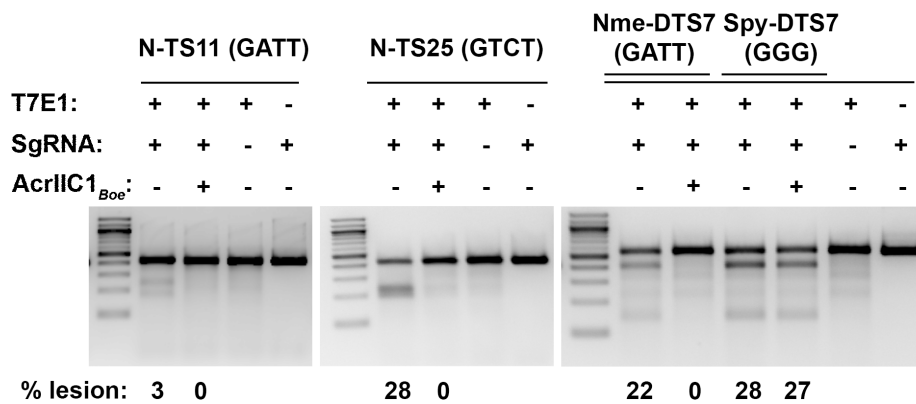

**B**

| Site     | Gene or locus | Spacer sequence          | Target site                                     |
|----------|---------------|--------------------------|-------------------------------------------------|
| N-TS1C   | SLC9A9        | GUGGUCUGGGGUACAGCCUUGGCA | TACTTGGTCTGGGGTACAGCCTTGGC <u>ATCATGATT</u> TTG |
| N-TS4B   | FLJ00328      | GGACAGGAGUCGCCAGAGGCCGGU | GCAGGACAGGAGTGCAGAGAGGCCGGT <u>GGTGGATT</u> TCC |
| N-TS4C   | FLJ00328      | GGGGCUGGCUCCACGUCGCGCCGC | TGCGGGGCTGGCTCCACGTCGCGCCG <u>CGCGGTTT</u> GGG  |
| N-TS7    | LOC100505797  | GAGGGAGAGAGGUGAGCGGAUGAA | GCAAAGGGAGAGAGGTGAGCGGATGAAGGGAGATTGGT          |
| N-TS8    | ESPN          | GGACGCAAUCCAGAGGUGAUGGG  | CGGCAGCAATTCCAGAGGTGATGGG <u>GAGTGATT</u> GTC   |
| N-TS11   | SMARCB1       | GUUCCAGUUGGAAGGCCAGUGC   | TAGATTCCAGTTGGGAAGGCCAGTGC <u>CTCCGATT</u> CCA  |
| N-TS25   | AC193513      | GGUUUCUCAUCCUGUCUUCUGCCU | CCGCGTTTCTCATCTGTCTTCTGCTT <u>AGTGGATA</u> TGT  |
| Nme-DTS3 | ARHGEF9       | GACUGAAGGCGAGGUCCGGGGCGG | GACTGAAGGCGAGGTCCGGGGCGG <u>AGGGGATT</u> GGG    |
| Spy-DTS3 | ARHGEF9       | GAAGGCGAGGUCCGGGGCGG     | GACTGAAGGCGAGGTCCGGGGCGG <u>AGGGGATT</u> GGG    |
| Nme-DTS7 | LSP1          | GGCUGGCACCCUCAUGUACCCAG  | GGCTGGCACCCCTCATGTACCCAG <u>GGGAGATT</u> CCA    |
| Spy-DTS7 | LSP1          | GGCACCCUCAUGUACCCAG      | GGCTGGCACCCCTCATGTACCCAG <u>GGGAGATT</u> CCA    |
