# Supplementary material
Source: PubMed Central journal article supplement (PMC5757841)
Supplement: NIHMS830354-supplement-5.pdf [file NIHMS830354-supplement-5.pdf]

| Anti-CRISPR                  | DNA sequence                                                                                                                                                                                                                                                                                                                                                                                                            | Protein sequence                                                                                                                           |
|------------------------------|-------------------------------------------------------------------------------------------------------------------------------------------------------------------------------------------------------------------------------------------------------------------------------------------------------------------------------------------------------------------------------------------------------------------------|--------------------------------------------------------------------------------------------------------------------------------------------|
| <b>AcrIIc1<sub>Boe</sub></b> | ATGGCCAAGGAGGTCTTCAAGCTGAAGCCGGAGCTGGTGACGT<br>ACAAGGGCTGCGGGTGGGCCCTGGCCTGCATCAAGGATGGCGA<br>GATCATCGACCTGACCTACGTGCGTGACCTGGGCATCGAGGAG<br>TACGATGAAAACCTTCGACGGCCTGGAGCCGGAGATCATCTATT<br>ACGACGTCGTGCGCTCGCAGGCGTGCAAGGAAGTGGCCTACCG<br>CTATGAAGAGATGGGCGAATTCACCTTCGGCCTCTGCAGCTGC<br>TGGGAATTCAACGTCATGTAA                                                                                                        | MAKEVFKLKPELVITYKGCWALACIK<br>DGEIIDLTYVRDLGIEEYDENFDGLE<br>PEIIYYDVVASQACKEVAYRYEEMGE<br>FTFGLCSCWEFNM                                    |
| <b>AcrIIc1<sub>Nme</sub></b> | ATGGCCAATAAACTTATAAAATTGGAAAAATGCCGGGTATG<br>ATGGCTGCGGTCTTTGTCTTCGCGCCATTTCTGAAAATGAAGC<br>TATCAAAGTTAAGTATTTGCGCGACATTTGTCTGATTACGAT<br>GGCGATGATAAAGCTGAGGATTGGCTGAGATGGGGAACGGACA<br>GCCGCGTCAAAGCAGCCGCTCTTGAATGGAGCAGTACGCATA<br>TACGTCGGTTGGTATGGCCTCATGTTGGGAGTTTGTGAACTA<br>TGA                                                                                                                                | MANKTYKIGKNAGYDGCGLCLAISE<br>NEAIKVYLRDPCDYDGDCKAEDWL<br>RWGTDSRVKAAALEMEQYAYTSVGMA<br>SCWEFVEL                                            |
| <b>AcrIIc2<sub>Nme</sub></b> | ATGGCCAGCAAAAACAATATTTTCAACAAGTATCCAACAATTA<br>TTCACGGCGAAGCGCGGGGGAGAAATGACGAATTTGTGGTGCA<br>TACGCGCTACCCGCGATTCTTGGCGCGGAAATCTTTTGACGAC<br>AATTTACGGGCGAAATGCCTGCAAAACCTGTTAACGGGGAAT<br>TGGGACAAAATCGGCGAACCGCGCCGCTTGCTTATGATTCACG<br>GCTTGGTTTTGTGGCTTTCTGACTTCATCATGTTGGACAACAAC<br>AAGCCGAAAAACATGGAGGATTGGCTTGGGCAATTTAAAGCCG<br>CCTGCGATCGAATCGCGGCGGATGATTTGATGCTGAATGAAGA<br>TGCGGCGGATTTGGAGGGCTGGGATGATTGA | MASKNNIFNKYPTIIHGARGENDEF<br>VVHTRYPRFLARKSFDDNFTGEMPAK<br>PVNGELGQIGEPRLAYDSRLGLWLS<br>DFIMLDNNKPKNMEDWLGQLKAACDR<br>IAADDLMLNEDAADLEGWDD |
| <b>AcrIIc3<sub>Nme</sub></b> | ATGGCCTTCAAACGCGCTATTATCTTCACTTCTTTCAACGGCT<br>TTGAAAAAGTTTCTCGAACTGAAAAACGCCGCTTGCCAAAAT<br>CATCAATGCTCGAGTTTCCATCATCGACGAATACTTGAGAGCC<br>AAAGACACCAACGCATCGCTTGACGGTCAGTACCGCGCTTTCT<br>TGTTCAACGACGAATCGCCGCAATGACCGAATTTCTGGCAA<br>ACTTAAAGCCTTTGCCGAAAGTTGCACCGGAATCAGCATCGAC<br>GCATGGGAAATTGAAGAAAAGCGAATACGTCCGCTGCCGGTGG<br>AACGCAGGGATTTCTTAGCGGCAGCCAACGGCAAAGAGATTTT<br>TAAAATTTAA                         | MAFKRAIIFTSFNGFEKVSRTKRRRL<br>AKIINARVSIIDEYLRAKDTNASLDG<br>QYRAFLFNDESPAMTEFLAKLKAF<br>SCTGISIDAWIEESEYVRLPVERRD<br>FLAAANGKEIFKI         |
| <b>AcrE2</b>                 | ATGGCCAATACCTATCTCATCGACCCCGCAAAAACAACGACA<br>ACTCCGGCGAGCGCTTACGGTTGACGCTGTGACATTACAGC<br>CGCCGCGAAGAGCGCAGCCAACAGATTTCTGGCGAGGAATTC<br>GAGGGCCTCGTATACCGTGAAACCGGGGAGAGTAACGGAAGTG<br>GCATGTTCCAGGCCTACCACCACCTGCACGGCACTAACCGCAC<br>GGAGACGACCGTTGGCTATCCGTTTCATGTAATGGAACCTCTGA                                                                                                                                     | MANTYLIDPRKNNDNSGERFTVDAVD<br>ITAAAKSAAQQILGEEFEGLVYRETG<br>ESNGSGMFQAYHHLHGTRNRTETTVGY<br>PFHVMEEL                                        |

| Anti-CRISPR                       | Species                              | Genome region prediction                | Accession #    | % ID to * | Size (aa) | Tested? |
|-----------------------------------|--------------------------------------|-----------------------------------------|----------------|-----------|-----------|---------|
| AcrIIc1                           | * <i>Brackiella oedipodis</i>        | putative integrated conjugative element | WP_028357638.1 | 100       | 91        | Yes     |
|                                   | <i>Alicyclophilus denitirificans</i> | plasmid                                 | ADV02121.1     | 26        | 92        |         |
|                                   | <i>Neisseria meningitidis</i>        | unclear                                 | WP_049360089.1 | 29        | 85        | Yes     |
|                                   | <i>Bordetella hinzii</i>             | prophage                                | WP_032962436.1 | 29        | 87        |         |
|                                   | <i>Verminephrobacter eiseniae</i>    | putative integrated conjugative plasmid | WP_041950174.1 | 23        | 103       |         |
|                                   | <i>Alicyclophilus denitirificans</i> | prophage                                | WP_013520332.1 | 28        | 133       |         |
|                                   | <i>Verminephrobacter eiseniae</i>    | unclear                                 | ABM59472.1     | 23        | 147       |         |
|                                   | <i>Pseudoalteromonas lipolytica</i>  | unclear                                 | WP_036972373.1 | 30        | 117       |         |
|                                   | <i>Tistrella mobilis</i>             | prophage                                | WP_014743597.1 | 32        | 85        |         |
|                                   | <i>Fnollaria massiliensis</i>        | putative transposable element           | WP_019214717.1 | 28        | 149       |         |
|                                   | <i>Bordetella sp.</i>                | putative integrated conjugative plasmid | WP_019939893.1 | 29        | 87        |         |
| AcrIIc2                           | * <i>Neisseria meningitidis</i>      | prophage                                | WP_042743678.1 | 100       | 123       | Yes     |
|                                   | <i>Neisseria meningitidis</i>        | prophage                                | CWP55982.1     | 96        | 132       |         |
|                                   | <i>Neisseria meningitidis</i>        | prophage                                | WP_061725849.1 | 96        | 123       |         |
|                                   | <i>Neisseria meningitidis</i>        | prophage                                | WP_002212355.1 | 95        | 123       |         |
|                                   | <i>Neisseria meningitidis</i>        | prophage                                | WP_021439709.1 | 94        | 123       |         |
|                                   | <i>Neisseria meningitidis</i>        | prophage                                | WP_061695141.1 | 93        | 123       |         |
|                                   | <i>Neisseria meningitidis</i>        | prophage                                | WP_002238681.1 | 92        | 123       |         |
|                                   | <i>Neisseria meningitidis</i>        | prophage                                | WP_002231709.1 | 91        | 123       |         |
|                                   | <i>Neisseria meningitidis</i>        | prophage                                | WP_061693463.1 | 90        | 123       |         |
|                                   | <i>Neisseria meningitidis</i>        | prophage                                | WP_061706309.1 | 90        | 123       |         |
|                                   | <i>Neisseria meningitidis</i>        | prophage                                | WP_002255675.1 | 89        | 123       |         |
|                                   | <i>Neisseria meningitidis</i>        | prophage                                | WP_061384810.1 | 89        | 123       |         |
|                                   | <i>Ralstonia solanacearum</i>        | putative integrated conjugative element | WP_019718638.1 | 33        | 130       |         |
|                                   | <i>Ralstonia solanacearum</i>        | putative integrated conjugative element | WP_011001812.1 | 32        | 130       |         |
|                                   | <i>Ralstonia solanacearum</i>        | putative integrated conjugative element | AMP37321.1     | 32        | 130       |         |
|                                   | <i>Ralstonia syzygii</i>             | unclear                                 | CCA86204.1     | 32        | 130       |         |
|                                   | <i>Ralstonia solanacearum</i>        | putative transposable element           | WP_013212199.1 | 32        | 130       |         |
|                                   | <i>Cupriavidus basilensis</i>        | unclear                                 | WP_017226229.1 | 31        | 128       |         |
|                                   | <i>Ralstonia solanacearum</i>        | putative transposable element           | WP_014616771.1 | 31        | 130       |         |
|                                   | <i>Ralstonia solanacearum</i>        | putative integrated conjugative element | WP_003265552.1 | 31        | 130       |         |
|                                   | <i>Ralstonia solanacearum</i>        | putative integrated conjugative element | WP_013205753.1 | 31        | 130       |         |
|                                   | <i>Ralstonia mannitolilytica</i>     | unclear                                 | WP_045787125.1 | 31        | 130       |         |
|                                   | <i>Ralstonia pickettii</i>           | unclear                                 | WP_024975412.1 | 31        | 130       |         |
|                                   | <i>Ralstonia pickettii</i>           | putative transposable element           | WP_004634308.1 | 31        | 131       |         |
|                                   | <i>Ralstonia sp.</i>                 | unclear                                 | WP_048932645.1 | 31        | 129       |         |
|                                   | <i>Ralstonia sp.</i>                 | unclear                                 | WP_009240943.1 | 31        | 131       |         |
|                                   | <i>Ralstonia sp.</i>                 | putative integrated conjugative element | WP_021194849.1 | 31        | 129       |         |
|                                   | <i>Ralstonia sp.</i>                 | unclear                                 | WP_039599631.1 | 31        | 129       |         |
|                                   | <i>Cupriavidus basilensis</i>        | unclear                                 | WP_006163540.1 | 30        | 128       |         |
|                                   | <i>Cupriavidus basilensis</i>        | unclear                                 | WP_043347745.1 | 30        | 128       |         |
|                                   | <i>Burkholderiaceae bacterium</i>    | unclear                                 | WP_045235538.1 | 30        | 128       |         |
|                                   | <i>Ralstonia sp.</i>                 | unclear                                 | WP_027681138.1 | 30        | 131       |         |
|                                   | <i>Cupriavidus sp.</i>               | unclear                                 | WP_039006692.1 | 30        | 126       |         |
|                                   | <i>Cupriavidus sp.</i>               | unclear                                 | WP_066735805.1 | 29        | 130       |         |
|                                   | <i>Cupriavidus sp.</i>               | unclear                                 | WP_035835797.1 | 28        | 130       |         |
|                                   | <i>Cupriavidus sp.</i>               | unclear                                 | WP_019451860.1 | 28        | 130       |         |
|                                   | <i>Cupriavidus sp.</i>               | unclear                                 | WP_020202326.1 | 28        | 128       |         |
|                                   | <i>Cupriavidus pauculus</i>          | unclear                                 | WP_061960205.1 | 28        | 127       |         |
|                                   | <i>Cupriavidus metallidurans</i>     | unclear                                 | WP_011516945.1 | 28        | 130       |         |
|                                   | <i>Cupriavidus sp.</i>               | unclear                                 | WP_029046347.1 | 28        | 126       |         |
|                                   | <i>Cupriavidus nantongensis</i>      | unclear                                 | WP_062800778.1 | 28        | 126       |         |
|                                   | <i>Cupriavidus oxalaticus</i>        | prophage                                | WP_063238209.1 | 28        | 126       |         |
|                                   | <i>Cupriavidus gilardii</i>          | unclear                                 | WP_053822121.1 | 27        | 127       |         |
|                                   | <i>Cupriavidus sp.</i>               | unclear                                 | WP_035882356.1 | 27        | 127       |         |
|                                   | <i>Cupriavidus sp.</i>               | unclear                                 | EKZ95749.1     | 27        | 130       |         |
|                                   | <i>Cupriavidus sp.</i>               | unclear                                 | WP_035818297.1 | 27        | 126       |         |
|                                   | <i>Cupriavidus sp.</i>               | unclear                                 | WP_006577295.1 | 27        | 127       |         |
|                                   | <i>Cupriavidus necator</i>           | unclear                                 | WP_013957324.1 | 27        | 126       |         |
|                                   | <i>Cupriavidus sp.</i>               | unclear                                 | WP_012353264.1 | 27        | 126       |         |
|                                   | <i>Cupriavidus necator</i>           | unclear                                 | WP_042886547.1 | 27        | 126       |         |
| <i>Burkholderiaceae</i>           | unclear                              | WP_010814353.1                          | 27             | 125       |           |         |
| <i>Ralstonia pickettii</i>        | unclear                              | WP_022535879.1                          | 27             | 126       |           |         |
| <i>Cupriavidus necator</i>        | unclear                              | WP_058697216.1                          | 27             | 125       |           |         |
| <i>Cupriavidus sp.</i>            | unclear                              | ODV41125.1                              | 27             | 130       |           |         |
| <i>Cupriavidus pinatubonensis</i> | unclear                              | WP_011298372.1                          | 26             | 130       |           |         |
| <i>Ralstonia sp.</i>              | unclear                              | WP_009522362.1                          | 24             | 131       |           |         |
| AcrIIc3                           | * <i>Neisseria meningitidis</i>      | prophage                                | WP_042743676.1 | 100       | 116       | Yes     |
|                                   | <i>Neisseria meningitidis</i>        | prophage                                | WP_002231708.1 | 93        | 116       |         |
|                                   | <i>Neisseria meningitidis</i>        | prophage                                | WP_061695142.1 | 91        | 116       |         |
|                                   | <i>Neisseria meningitidis</i>        | prophage                                | WP_061384809.1 | 91        | 116       |         |
|                                   | <i>Neisseria meningitidis</i>        | prophage                                | WP_061725842.1 | 91        | 116       |         |
|                                   | <i>Neisseria meningitidis</i>        | prophage                                | WP_061725391.1 | 88        | 116       |         |
|                                   | <i>Neisseria meningitidis</i>        | prophage                                | WP_025455551.1 | 87        | 116       |         |
|                                   | <i>Neisseria meningitidis</i>        | prophage                                | WP_061706308.1 | 86        | 116       |         |
|                                   | <i>Neisseria meningitidis</i>        | prophage                                | EFM05431.1     | 87        | 138       |         |
|                                   | <i>Neisseria meningitidis</i>        | prophage                                | WP_002255674.1 | 85        | 116       |         |
|                                   | <i>Neisseria meningitidis</i>        | prophage                                | WP_002238680.1 | 86        | 117       |         |
|                                   | <i>Neisseria meningitidis</i>        | prophage                                | EQD23083.1     | 91        | 75        |         |
|                                   | <i>Neisseria meningitidis</i>        | prophage                                | EQD21340.1     | 88        | 73        |         |
|                                   | <i>Neisseria meningitidis</i>        | prophage                                | EQD23377.1     | 78        | 63        |         |

| PLASMID NAME/CONSTRUCT                  | TARGET SITE           | T7E1 F- OLIGO                 | T7E1 R- OLIGO                   | SPACER CLONING F-OLIGO               | SPACER CLONING R-OLIGO                | SPACER SEQUENCE               | LOCUS NAME       | CHROMOSOME NUMBER |
|-----------------------------------------|-----------------------|-------------------------------|---------------------------------|--------------------------------------|---------------------------------------|-------------------------------|------------------|-------------------|
| pEJS161: pSimpleII-NmeCas9-sgRNA/NTS1C  | N-TS1C                | GCACTTATTCTGG<br>CCCCTGACTGC  | GAGAACCATGGTCT<br>GGGAAGAAGACC  | CACCGTGGTCTGG<br>GGTACAGCCTTGG<br>CA | CAACTGCCAAGGC<br>TGTACCCAGACC<br>AC   | GTGGTCTGGGGT<br>ACAGCCTTGCCA  | SLC9A9           | 3                 |
| pEJS173: pSimpleII-NmeCas9-sgRNA/NTS4B  | N-TS4B                | AGAGGAGCCTTCT<br>GACTGCTGCAGA | AGGTCTGGCCTTG<br>CCTTCGA        | CACCGGACAGGAG<br>TCGCCAGAGGCCG<br>GT | CAACACCGGCCTC<br>TGGCGACTCCTGT<br>CC  | GGACAGGAGTCG<br>CCAGAGGCCGGT  | FLJ00328         | 14                |
| pEJS174: pSimpleII-NmeCas9-sgRNA/NTS4C  | N-TS4C                | AGAGGAGCCTTCT<br>GACTGCTGCAGA | AGGTCTGGCCTTG<br>CCTTCGA        | CACCGGGGCTGGC<br>TCCACGTCGCCGC<br>GC | CAACGCGGCGCGA<br>CGTGGAGCCAGCC<br>CC  | GGGGCTGGCTCC<br>ACGTCCGCGCGC  | FLJ00328         | 14                |
| pEJS212: pSimpleII-NmeCas9-sgRNA/NTS7   | N-TS7                 | GGACAGAAGAGAG<br>TAGGGAGACGAG | GCATTCTGTCATCT<br>GCATATCCCTCTG | CACCGAGGGAGAG<br>AGGTGAGCGGATG<br>AA | CAACTTCATCCGC<br>TCACCTCTCTCCC<br>TC  | GAGGGAGAGAGG<br>TGACGGATGAA   | LOC10050<br>5797 | 18                |
| pEJS224: pSimpleII-NmeCas9-sgRNA/NTS8   | N-TS8                 | TGCCTCACGTAAC<br>AGTTGAGACCC  | TGCCCTCCCCGCTG<br>GAACCT        | CACCGGACGCAAT<br>TCCAGAGGTGATG<br>GG | CAACCCCATCACC<br>TCTGGAATTGCGT<br>CC  | GGACGCAATTCC<br>AGAGGTGATGGG  | ESPN             | 1                 |
| pEJS236: pSimpleII-NmeCas9-sgRNA/NTS11  | N-TS11                | ACAGGCAACTCCA<br>TCCATGAGCC   | CTTACAGCACTTA<br>GGACTGTCTG     | CACCGTTCCAGTT<br>GGGAAGGGCCAGT<br>GC | CAACGCACTGGCC<br>CTTCCCAACTGGA<br>AC  | GTTCCAGTTGGG<br>AAGGGCCAGTGC  | SMARCB1          | 22                |
| pEJS323: pSimpleII-NmeCas9-sgRNA/NTS25  | N-TS25                | GCAATCCACCCAA<br>TGCTAACTGG   | TGAACACAAAGGCC<br>TCCAGATCC     | CACCGGTTTCTCA<br>TCTGTCTTCTG<br>CT   | CAACAGGCAGAAAG<br>ACAGGATGAGAAA<br>CC | GGTTTCTCATCC<br>TGCTTCTGCCT   | AC193513         | 7                 |
| pEJS337: pLK.O1-NmeSgRNA/DTS3           | D-TS3 (Nme)           | GGACAAAAGCAGC<br>CCATTAG      | GGACTCCTAAAATG<br>GCCACA        | CACCGACTGAAGG<br>CGAGGTCCGGGGC<br>GG | CAACCCGCCCCGG<br>ACCTCGCCTTCAG<br>TC  | GACTGAAGGCGA<br>GGTCCGGGGCGG  | ARHGEF9          | X                 |
| pEJS399: pLK.O1-SpySgRNA/DTS3           | D-TS3 (Spy)           | GGACAAAAGCAGC<br>CCATTAG      | GGACTCCTAAAATG<br>GCCACA        | ACCGGAAGGGCAG<br>GTCCGGGGCGG         | AAACCCGCCCCGG<br>ACCTCGCCTTC          | GAAGGCGAGGTC<br>CGGGGCGG      | ARHGEF9          | X                 |
| pEJS341: pLK.O1-NmeSgRNA/DTS7           | D-TS7 (Nme)           | AGGACTGCTCTCA<br>GCTACCG      | AAGGGCAGAGAGGC<br>TAAAGG        | CACCGGCTGGCAC<br>CCTCCATGTACCC<br>AG | CAACCTGGGTACA<br>TGGAGGTTGCCAG<br>CC  | GGCTGGCACCCCT<br>CCATGTACCCAG | LSP1             | 11                |
| pEJS400: pLK.O1-SpySgRNA/DTS7           | D-TS7 (Spy)           | AGGACTGCTCTCA<br>GCTACCG      | AAGGGCAGAGAGGC<br>TAAAGG        | ACCGGACCCCTC<br>CATGTACCCAG          | AAACCTGGGTACA<br>TGGAGGTTGCC          | GGCACCCCTCCAT<br>GTACCCAG     | LSP1             | 11                |
| pEJS468: pLK.O1-NmeSgRNA/DTS13-Telomere | D-TS13 (Nme-telomere) | N/A                           | N/A                             | ACCGTTAGGGTTA<br>GGGTTAGGGTTAG<br>GG | CAACCCTAACCC<br>TAACCCTAACCC<br>AA    | TTAGGGTTAGGG<br>TTAGGGTTAGGG  | N/A              | N/A               |
| pEJS469: pLK.O1-SpySgRNA/DTS13-Telomere | D-TS13 (Spy-telomere) | N/A                           | N/A                             | ACCGTTAGGGTTA<br>GGGTTAGGGTT         | AAACAACCCTAAC<br>CCTAACCCTA           | TTAGGGTTAGGG<br>TTAGGGTT      | N/A              | N/A               |
