# Supplementary material
Source: PubMed Central journal article supplement (PMC5757841)

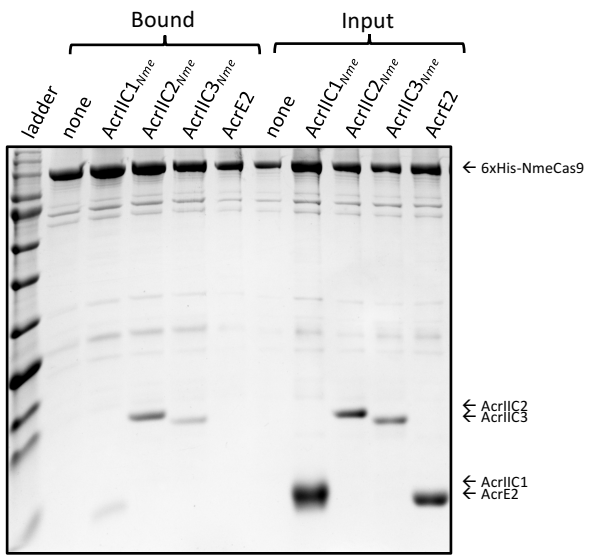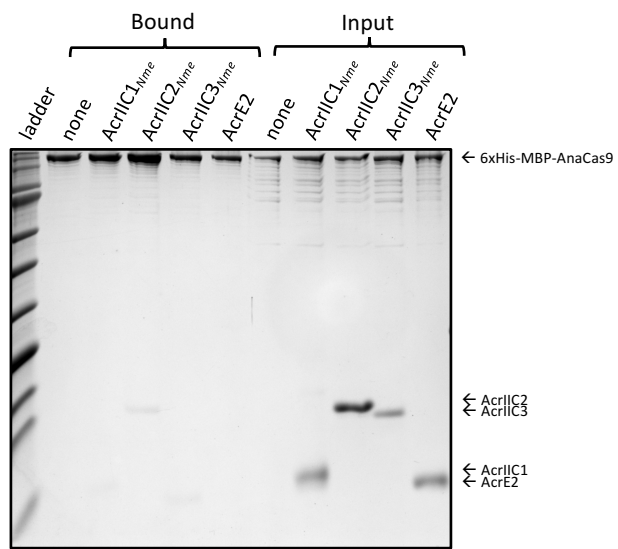

Supplement: NIHMS830354-supplement-2.pdf [file NIHMS830354-supplement-2.pdf]

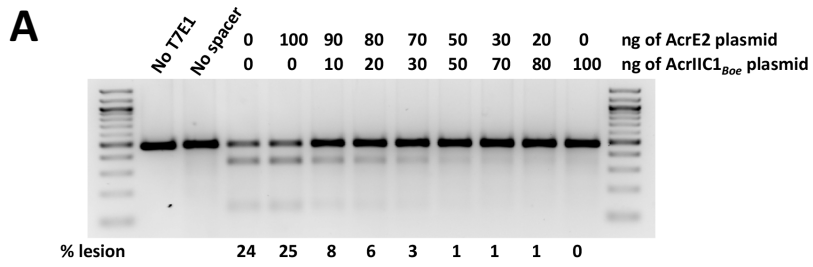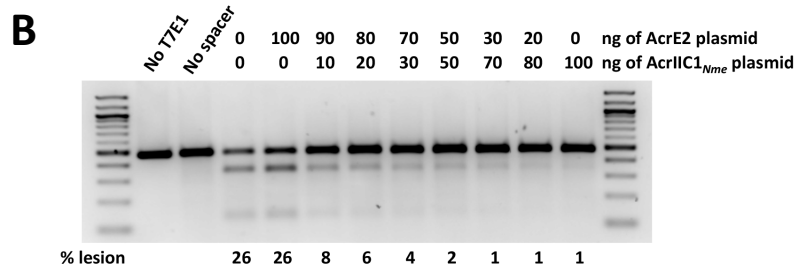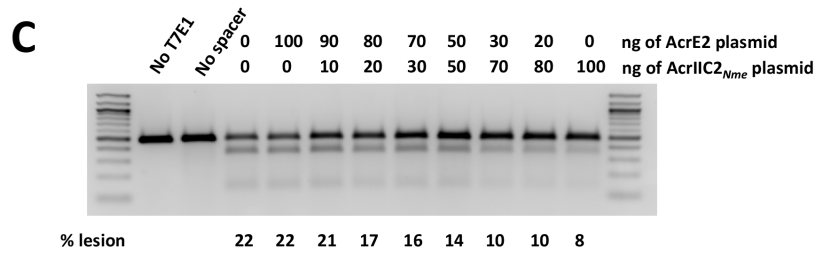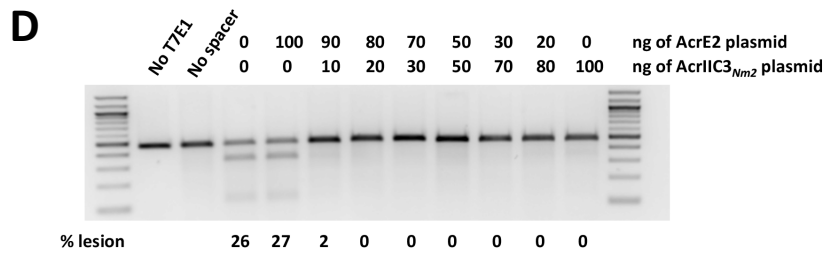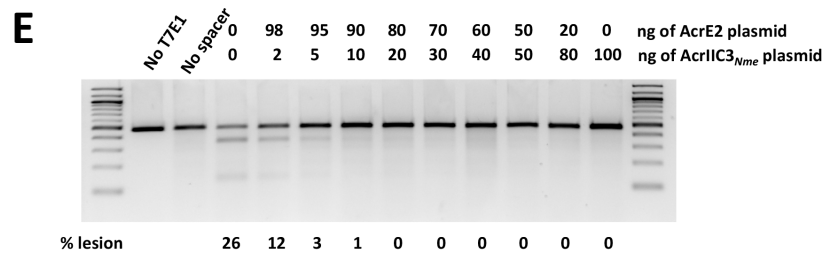

Supplement: NIHMS830354-supplement-4.pdf [file NIHMS830354-supplement-4.pdf]
